# Supplementary material
Source: publisher site journal article supplement (https://www.dovepress.com/article/497940)
Supplement: Supplementary file 1 [file get_supplementary_file.php]

# Supplementary data

# Method

## Proteome Analysis using Mass Spectrometry

### Sample Preparation

After collecting small extracellular vesicles (sEVs) via tangential flow filtration (TFF), the sEVs were concentrated using Amicon® Ultra-15 Centrifugal Filter Units (3 kDa, Merck Millipore™) and lysed through three cycles of sonication (30 seconds on, 1 minute off). A total of 50 μg of protein was then resuspended in 50 μL of 50 mM ammonium bicarbonate (Sigma-Aldrich), followed by the addition of 50 µL of 0.1% RapiGest™ SF (Waters). The mixture was concentrated and heated at 80°C for 15 minutes before adding 100 mM DTT (Sigma-Aldrich) and subsequently 200 mM iodoacetamide (Sigma-Aldrich). The sample was then digested overnight at 37°C using a Trypsin-LysC mixture enzyme (1.0 µg/µL, Mass Spec Grade, Promega). The enzyme digestion reaction was halted by adding concentrated trifluoroacetic acid (TFA, Sigma-Aldrich). Following centrifugation, the supernatant was stored at −80°C until further use.

### Liquid Chromatography (LC) Analysis and Protein Identification Analysis using Mass Spectrometer

Following sample preparation, LC system featured an EASY-Spray column Acclaim™ PepMap™ C18 100 Å (2 μm particle size, 50 μm inner diameter × 15 cm) was used at a flow rate of 250 nL/min at 35℃. The mobile phase comprised a gradient of solvent A (0.1% formic acid in water) and solvent B (0.1% formic acid in acetonitrile). Protein identification and quantification were performed using mass spectrometry (Orbitrap Fusion, Thermo Fisher Scientific) coupled to the LC system. The analysis of mass spectrometry was run in data-dependent mode. Full scan spectra were acquired utilizing orbitrap MS (OTMS) with the following settings: scan range of 310-1800 m/z, resolving power of 120k, AGC target of 4.0e5, and maximum injection time of 50 ms. The method used 3-second Top Speed Mode for precursor selection for each cycle. The MS2 analysis was only performed on precursors having an assigned monoisotopic m/z and a charge state ranging from two to seven. A 20-second dynamic exclusion window and a 5k-intensity threshold were used to filter all precursors. The MS2 spectra were analyzed using ion trap MS (ITMS) with specific parameters, which are rapid scan rate with 60k-resolving power, AGC target of 1.0e2, 1.6 m/z isolation window, and 250 ms as maximum injection time. Both collision-induced dissociation (CID) and high-energy collision dissociation (HCD) at normalized impact energies of 30% and 28%, were used to fragment precursors.

### Bioinformatic Analysis for Protein Profiling

Proteome Discoverer™ Software (version 2.5; Thermo Fisher Scientific) was used for protein identification analysis. A Homo sapiens database, downloaded from UniProt, was used for peptide matching. The analysis permitted up to two missed cleavages during proteolytic digestion. For accurate mass matching, the MS1 and MS2 tolerances were set at 10 ppm and 0.6 Da, respectively. Variable modifications, including N-terminal acetylation and methionine oxidation, were considered, while carbamidomethylation of cysteine residues was set as a fixed modification.

Data pre-processing was carried out using Perseus software (version 2.0.10.0) to normalize the data, eliminate unnecessary variances, and filter out low-quality data, thereby enhancing the accuracy and interpretability of downstream results. Initially, the database was imported into Perseus. The data was then refined by removing contaminants and proteins detected in only one out of three technical replicates, which improved data quality and minimized the likelihood of false positives or noise in subsequent analyses.

After data pre-processing and quality control, the Database for Annotation, Visualization, and Integrated Discovery (DAVID) was utilized to gain insights into the cellular components, molecular functions, and biological processes associated with the identified proteins 1,2. A Venn diagram was generated using an online tool (http://bioinformatics.psb.ugent.be/webtools/Venn/) to compare gene lists and identify small extracellular vesicle (sEV) markers from this study, in comparison with the ExoCarta (accessed on 02.07.2023) 3,4 and Vesiclepedia (accessed on 02.07.2023) databases 5,6. Protein–protein interactions among the proteins identified in MSC-sEVs were analyzed using the STRING database (https://string-db.org/, version 12.0) to explore functional protein association networks. The criteria for network visualization included a maximum False Discovery Rate (FDR) of 0.05, a minimum interaction strength of 0.01, and a minimum count of 2 proteins required for inclusion in the network.

## miRNA Sequencing Analysis

### Sample Preparation

After collecting sEVs using TF), the sEVs underwent ultracentrifugation at 100,000 × g for 70 minutes at 4°C using a Beckman Coulter Optima™ XE100 Ultracentrifuge. Total RNA from the sEVs was then extracted using the miRNeasy Mini Kit (Qiagen, Germany), following the manufacturer’s instructions. Following RNA isolation, the concentration of the extracted RNA was measured using the Nanodrop 2000 instrument. The integrity and size distribution of the RNA were subsequently assessed using the Agilent RNA ScreenTape, ensuring that the RNA remained intact and free from degradation.

### Small RNA sequencing by Illumina HiSeq /Novaseq

For small RNA sequencing, total RNA was ligated to 3’- and 5’-RNA adapters, and reversely transcribed to generate cDNA libraries. Libraries were PCR amplified, purified using DNA clean beads and size selected using PAGE purification, followed by validated using Agilent 2100 Bioanalyzer. Then, qualified libraries were sequenced using an Illumina HiseqXten/Novaseq System.

### Bioinformatics analysis for miRNA profiling

Raw reads obtained from small RNA sequencing were processed using Trimmomatic (v0.30) to remove contaminants and adapter sequences. The cleaned reads were then aligned to the miRBase and Rfam databases for miRNA and non-coding RNA (ncRNA) subtype annotation, respectively. For sequences without direct repetitive sequence annotation information, predictions were made based on the reference genome, and the small RNA counts were summarized across each annotation category. The miRNA sequences were further aligned to mRNA exons and introns to identify the originating mRNA of the miRNA fragments. Novel miRNA prediction involved analyzing the hairpin structures of miRNA precursors. Initially, reads were aligned to the reference genome, with those mapping to multiple sites removed. miRDeep2 (V2_0_0_8) was then used to model all possible secondary structures of miRNA precursors based on the alignment data. These secondary structures were evaluated using a scoring system to identify novel miRNA sequences.

Following the processing and quality control of raw data, miRNA Enrichment Analysis and Annotation Tool (miEAA) in conjunction with GeneTrail was used to gain insights into the RNA localisation, molecular function and biological processes with the discovered miRNA 7. Before commencing the analysis, the older miRNA ID were converted to the version 21 of miRBase for miRNA ID using miRBase converter within miEAA. Then, over-representation analysis (ORA) was performed with the additional parameters. Several categories such as Annotations derived over miRTarBase (Gene Ontology) and Localization (RNALocate) were chosen. The p-value adjustments using False Discovery Rate (FDR) (Benjamini-Hochberg procedure) with significance level of 0.05, setting a threshold value of 1. Moreover, a Venn diagram was generated using the online tool (http://bioinformatics.psb.ugent.be/ webtools/Venn/) to compare lists of miRNAs. This comparison aimed to identify miRNAs in sEVs discovered in our study and compare them with entries in the ExoCarta database (accessed on 01.09.2023) 3,4 and Vesiclepedia database (accessed on 01.09.2023) 5,6.

# Result

## Proteomic Profiling of sEV

Proteomic analysis of UC-MSC-sEVs identified 148 proteins after the removal of contaminants. A Venn diagram was used to compare the proteins identified in this study with extracellular vesicle (EV) markers from the ExoCarta and Vesiclepedia databases, highlighting the overlaps. As shown in Figure S1 (A) and Table S1, 93 proteins from UC-MSC-sEVs overlapped with those reported in Vesiclepedia, 84 overlapped with ExoCarta, and 83 were common to both databases. The comparison between Vesiclepedia and MSC-sEVs revealed an additional 10 overlapping genes (FSTL1, CST7, TMEM198, ORM2, CDH4, LMOD2, CPA4, HEATR1, THAP5, and PXK), while an additional 1 gene (IGK) overlapped with the ExoCarta database. Moreover, 5 genes from MSC-sEVs did not overlap with either database, and 49 genes from MSC-sEVs were not detected in either database.

Enrichment analysis of the protein cargo within EVs revealed several significant terms related to biological processes, cellular components, and molecular functions. The top 10 cellular components, molecular functions, biological processes, Kyoto Encyclopedia of Genes and Genomes (KEGG) pathways, and Reactome pathways for sEV proteins are shown in Figure S1 (B-F). The results indicated that MSC-sEV proteins are predominantly localized in extracellular exosomes and regions, supporting their identification as sEVs. On a molecular level, MSC-sEVs exhibited activities related to extracellular matrix (ECM) structural components and various binding functions. Biologically, MSC-sEVs were associated with a wide range of physiological and cellular processes, particularly those linked to wound healing and skin regeneration. Pathway analyses further highlighted enrichment in immunomodulatory activities and skin regeneration pathways, suggesting a potential role for MSC-sEVs in promoting skin healing and regeneration through complex molecular and biological mechanisms.


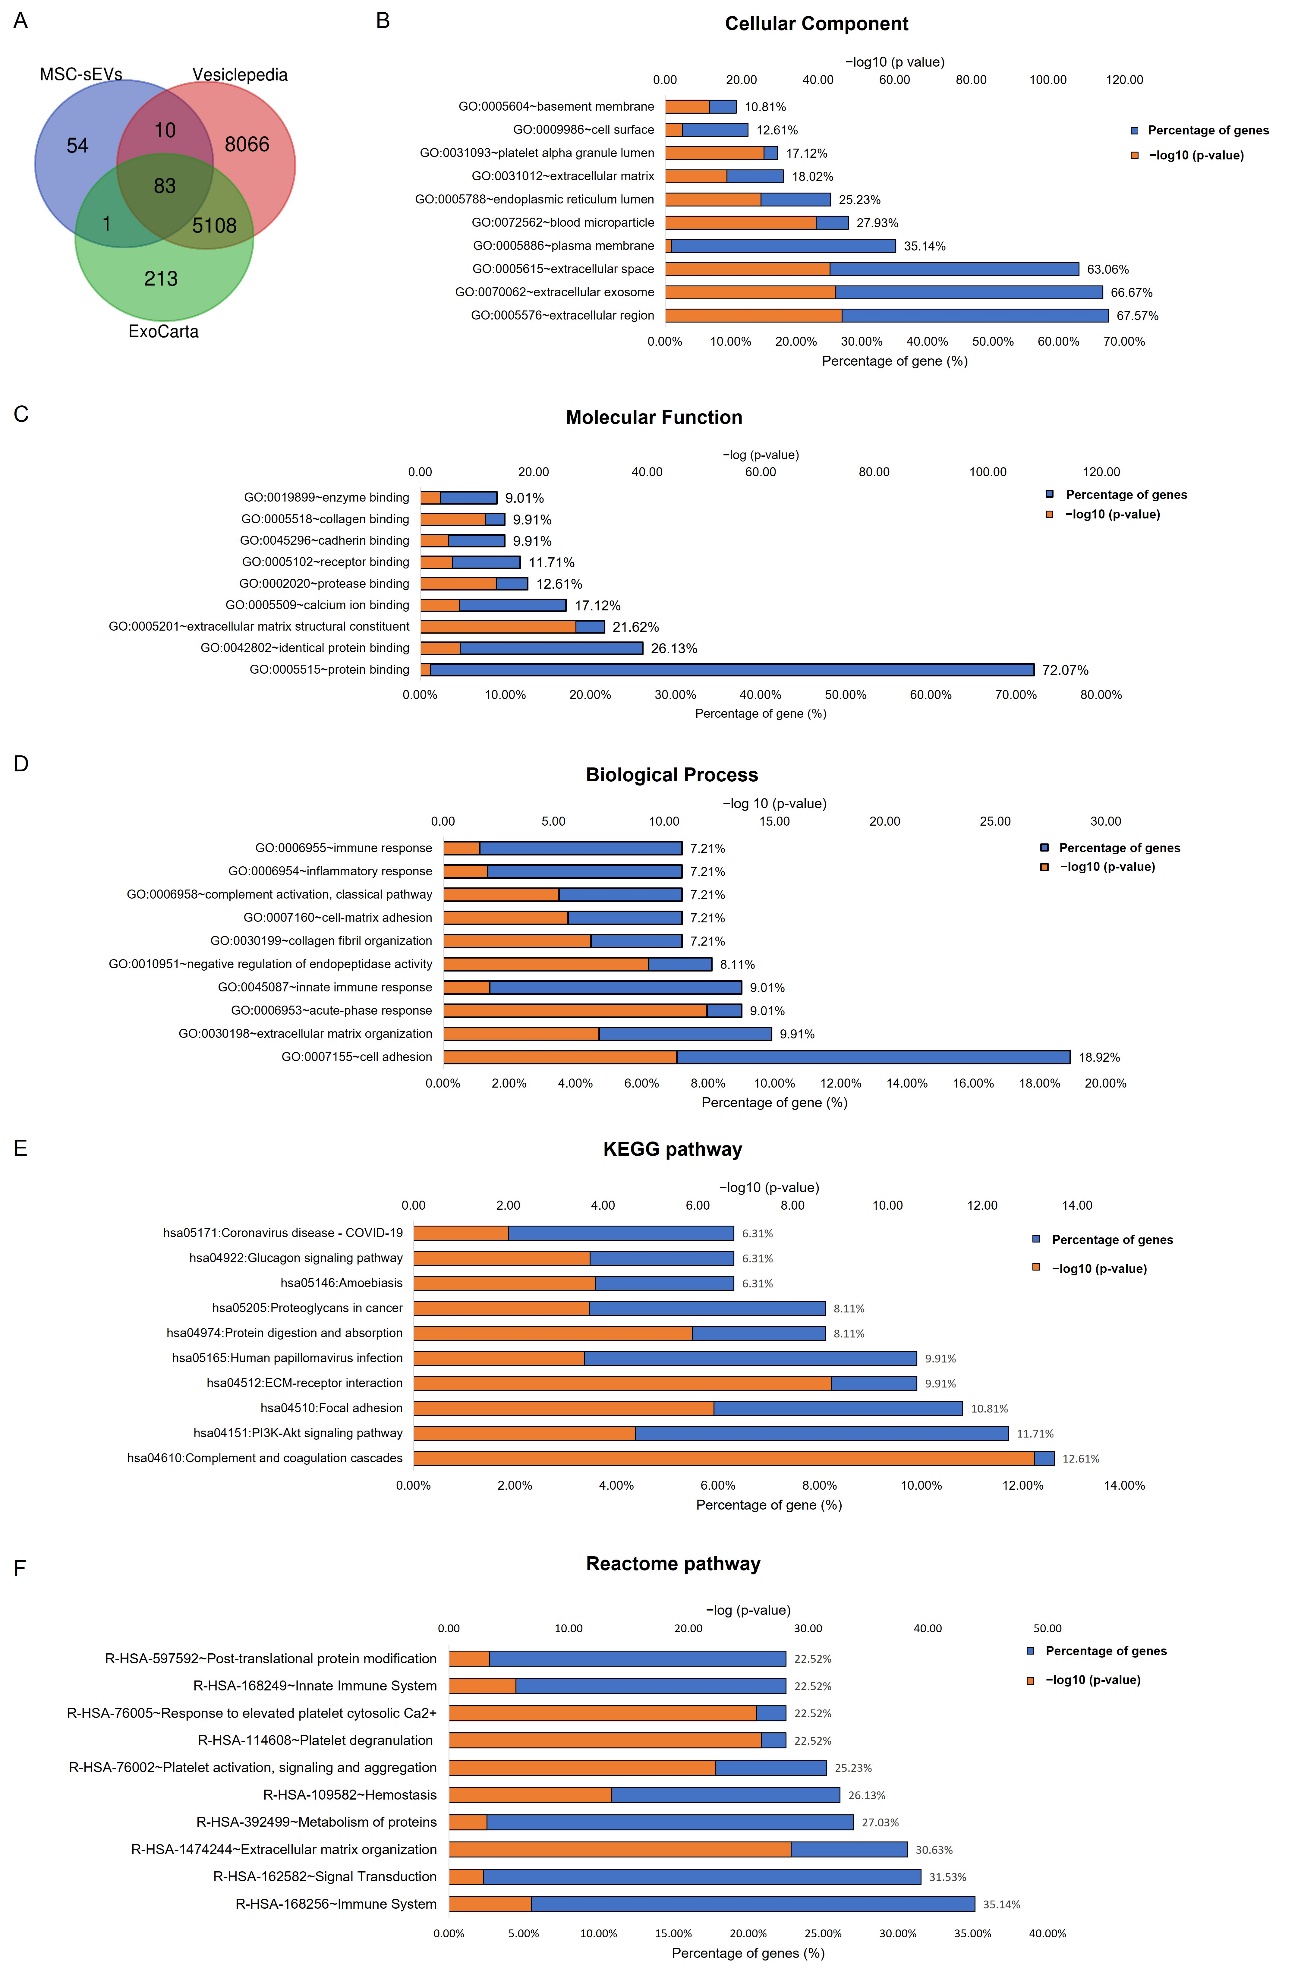


**Figure S1: Proteomic profiling of MSC-sEVs.** (A) Venn diagram illustrating the overlap of proteins identified in ExoCarta, Vesiclepedia, and MSC-sEVs. (B–F) Top 10 terms for GO classification of identified proteins, including cellular components, molecular functions, and biological processes, as well as KEGG and Reactome pathways. All GO data displayed have a p-value less than 0.001.

**Table S1:** Identified sEVs proteome in this study.

| **MSC-sEVs that overlapped with ExoCarta and Vesiclepedia** | | | | |
| --- | --- | --- | --- | --- |
| MMP2 | FGA | ECM1 | FGB | COL5A2 |
| COL1A1 | A1BG | IGHM | VIM | TIMP1 |
| EMILIN1 | TIMP2 | COL2A1 | LGALS3BP | HSP90AB1 |
| HP | SPOCK1 | THBS2 | CLSTN1 | VASN |
| APOA2 | HSPB1 | SERPINE1 | APCS | GAPDH |
| C4B | KPNA2 | ACTG2 | MON2 | C1R |
| PLBD2 | C3 | PGAM4 | HPX | FGG |
| TXNRD1 | HSPA8 | TGFBI | COL6A1 | CFH |
| ACTBL2 | FN1 | A2M | SPARC | FBLN1 |
| SCFV | YWHAZ | ORM1 | COL5A1 | VTN |
| SERPINA3 | CTSB | AGRN | APOA1 | LAMC1 |
| IGFBP7 | LUM | THBS1 | PCOLCE | PKM |
| SERPINA1 | FSCN1 | VCAN | IGHG4 | QSOX1 |
| COL6A2 | NME1 | DCN | YWHAQ | FLNA |
| LDHA | GOLM1 | ACTN1 | RPLP1 | CP |
| PTX3 | CDH2 | COL1A2 | LDHB |  |
| COL3A1 | MYL6 | COL12A1 | GC |  |
| **Unique protein that identified in MSC-sEVs** | | | | |
| B4DPN0 | A0A7S5C3G8 | Q6GMV7 | A0A650F0N3 | A2KBC0 |
| A0A5C2FVR7 | A0A5C2FYC1 | A0A5C2GJ05 | A0A5C2FUF3 | B4DUI5 |
| B4DNL5 | A0A384NKS6 | G9K389 | A0A7S5EW40 | A0A384MR25 |
| A0A0K0K1H8 | Q6N093 | A0A5C2G1N1 | V9HW34 | A0A5C2GCU9 |
| B2R7F8 | H2AC20 | A0A5C2GMY4 | A0A5C2GHK5 | A0A5C2FZE3 |
| E2DRY6 | A0A7S5BZ61 | A0A1U9X7H4 | CYP27C1 | NT5C3B |
| B4DDQ2 | B7Z556 | B4DVY2 | Q9UJZ7 | B2RDW0 |
| Q6N096 | SIGLEC16 | Q9UP60 | S6BGD6 | Q5EBM2 |
| FAR2P1 | A0A7S5BZF4 | A0A5C2G5X7 | B4DMR3 | A0A8I5KW61 |
| A0A5C2FYV6 | B4E0A4 | Q69EZ8 | A0A5C2GS81 | A0A5C2G9L7 |
| A0A5C2GMF3 | A0A679KL62 | A0A5C2GIN5 | A0A5C2GQE4 |  |

## Protein interaction analysis

Protein-protein interaction networks were constructed using STRING to validate the functional associations of genes identified by DAVID through their interactions with other proteins 8. Figure S2 (A) shows the network mapping of 92 proteins in MSC-sEVs. STRING analysis revealed 13 KEGG pathways (Table S2) and 80 Reactome pathways (Table S3) significantly enriched in the dataset.

In the KEGG pathway analysis, interactions of proteins involved in ECM receptor interaction, focal adhesion, TGF-beta signaling, and PI3K-Akt signaling pathways—key components of ECM remodeling—are visualized in Figure S2 (B-E). However, the TGF-beta signaling pathway did not show significant enrichment. Similarly, in the Reactome pathway analysis (Figure S2 (F-J)), pathways related to ECM organization, ECM degradation, collagen formation, collagen degradation, and activation of MMPs—critical for ECM remodeling—were visualized. Notably, the collagen formation pathway was not found to be enriched. These observations indicate a focus on downstream events and ECM degradation rather than upstream processes like collagen formation and TGF-beta signaling in the analyzed datasets. Additionally, the absence of proteins associated with melanogenesis suggests that the MSC-sEV proteome may not directly regulate melanogenesis.


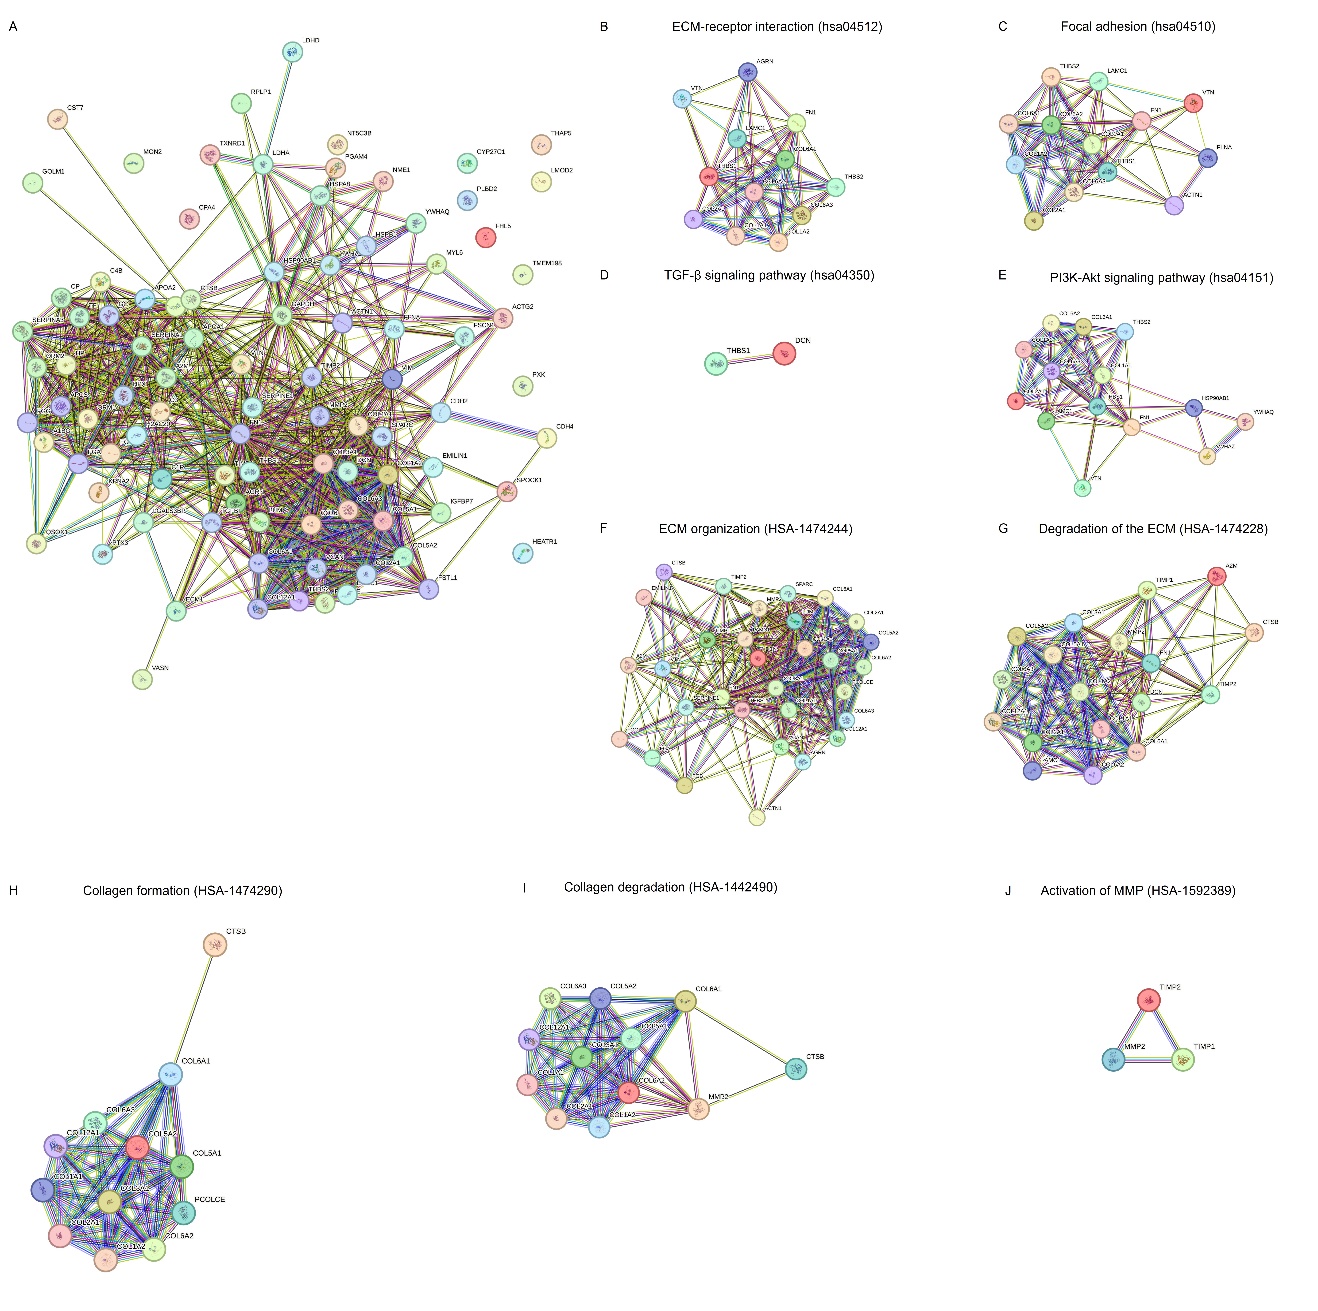


**Figure S2:** STRING analysis of MSC-sEVs. (A) Network mapping of 92 proteins in MSC-sEVs. (B-E) Protein interaction involved in KEGG pathway. (F-J) Protein interaction involved in Reactome pathway.

**Table S2:** Protein interactions within the KEGG pathway identified through STRING.

| #term ID | term description | observed gene count | background gene count | strength | false discovery rate | matching proteins in your network (labels) |
| --- | --- | --- | --- | --- | --- | --- |
| hsa04512 | ECM-receptor interaction | 12 | 88 | 1.47 | 1.23E-11 | COL1A1, VTN, LAMC1, THBS1, COL6A3, COL1A2, COL6A2, FN1, COL6A1, THBS2, AGRN, COL2A1 |
| hsa04610 | Complement and coagulation cascades | 11 | 82 | 1.46 | 8.87E-11 | SERPINE1, VTN, C3, FGB, CLU, A2M, FGG, C4B, SERPINA1, C1R, FGA |
| hsa04510 | Focal adhesion | 13 | 195 | 1.15 | 1.58E-09 | COL1A1, VTN, LAMC1, THBS1, COL6A3, COL1A2, COL6A2, FN1, COL6A1, THBS2, FLNA, COL2A1, ACTN1 |
| hsa04974 | Protein digestion and absorption | 10 | 100 | 1.33 | 7.68E-09 | COL1A1, COL6A3, COL1A2, COL6A2, COL3A1, COL12A1, COL6A1, COL5A1, COL5A2, COL2A1 |
| hsa04151 | PI3K-Akt signaling pathway | 14 | 349 | 0.93 | 8.83E-08 | COL1A1, VTN, LAMC1, THBS1, COL6A3, COL1A2, COL6A2, FN1, COL6A1, THBS2, HSP90AB1, COL2A1, YWHAQ, YWHAZ |
| hsa05165 | Human papillomavirus infection | 11 | 324 | 0.86 | 2.46E-05 | COL1A1, VTN, LAMC1, THBS1, COL6A3, COL1A2, COL6A2, FN1, COL6A1, THBS2, COL2A1 |
| hsa05205 | Proteoglycans in cancer | 9 | 194 | 1 | 2.46E-05 | DCN, MMP2, COL1A1, VTN, THBS1, LUM, COL1A2, FN1, FLNA |
| hsa05146 | Amoebiasis | 7 | 101 | 1.17 | 2.98E-05 | COL1A1, HSPB1, LAMC1, COL1A2, COL3A1, FN1, ACTN1 |
| hsa04933 | AGE-RAGE signaling pathway in diabetic complications | 6 | 96 | 1.13 | 0.0003 | MMP2, SERPINE1, COL1A1, COL1A2, COL3A1, FN1 |
| hsa04611 | Platelet activation | 6 | 122 | 1.02 | 0.00099 | COL1A1, COL1A2, COL3A1, FGB, FGG, FGA |
| hsa05322 | Systemic lupus erythematosus | 5 | 94 | 1.06 | 0.003 | C3, H2AC20, ACTN1, C4B, C1R |
| hsa04066 | HIF-1 signaling pathway | 5 | 102 | 1.02 | 0.004 | TIMP1, SERPINE1, GAPDH, TF, LDHA |
| hsa05150 | Staphylococcus aureus infection | 4 | 86 | 1 | 0.0213 | C3, FGG, C4B, C1R |

**Table S3:** Protein interactions within the Reactome pathway identified through STRING.

| **#term ID** | **term description** | **observed gene count** | **background gene count** | **strength** | **false discovery rate** | **matching proteins in your network (labels)** |
| --- | --- | --- | --- | --- | --- | --- |
| hsa-1474244 | Extracellular matrix organization | 31 | 300 | 1.34 | 5.55E-29 | DCN, TIMP1, MMP2, PCOLCE, SERPINE1, COL1A1, VTN, SPARC, LAMC1, THBS1, TIMP2, VCAN, LUM, COL6A3, COL1A2, COL6A2, COL3A1, FGB, A2M, COL12A1, FGG, CTSB, FN1, COL6A1, COL5A1, COL5A2, AGRN, EMILIN1, COL2A1, ACTN1, FGA |
| hsa-114608 | Platelet degranulation | 22 | 126 | 1.57 | 2.25E-24 | TIMP1, SERPINE1, SPARC, APOA1, ORM1, THBS1, LGALS3BP, A1BG, FGB, CLU, A2M, FGG, FN1, QSOX1, ECM1, FLNA, ACTN1, TF, ORM2, SERPINA1, SERPINA3, FGA |
| hsa-76002 | Platelet activation, signaling and aggregation | 25 | 260 | 1.31 | 1.67E-22 | TIMP1, SERPINE1, COL1A1, SPARC, APOA1, ORM1, THBS1, LGALS3BP, A1BG, COL1A2, FGB, CLU, A2M, FGG, FN1, QSOX1, ECM1, FLNA, ACTN1, YWHAZ, TF, ORM2, SERPINA1, SERPINA3, FGA |
| hsa-3000178 | ECM proteoglycans | 18 | 76 | 1.71 | 5.48E-22 | DCN, SERPINE1, COL1A1, VTN, SPARC, LAMC1, VCAN, LUM, COL6A3, COL1A2, COL6A2, COL3A1, FN1, COL6A1, COL5A1, COL5A2, AGRN, COL2A1 |
| hsa-216083 | Integrin cell surface interactions | 17 | 85 | 1.63 | 1.24E-19 | COL1A1, VTN, THBS1, LUM, COL6A3, COL1A2, COL6A2, COL3A1, FGB, FGG, FN1, COL6A1, COL5A1, COL5A2, AGRN, COL2A1, FGA |
| hsa-381426 | Regulation of Insulin-like Growth Factor (IGF) transport and uptake by Insulin-like Growth Factor Binding Proteins (IGFBPs) | 18 | 124 | 1.49 | 1.02E-18 | TIMP1, MMP2, APOA1, C3, LAMC1, CP, VCAN, CDH2, FSTL1, IGFBP7, FGG, FN1, QSOX1, APOA2, GOLM1, TF, SERPINA1, FGA |
| hsa-8957275 | Post-translational protein phosphorylation | 17 | 107 | 1.53 | 3.09E-18 | TIMP1, APOA1, C3, LAMC1, CP, VCAN, CDH2, FSTL1, IGFBP7, FGG, FN1, QSOX1, APOA2, GOLM1, TF, SERPINA1, FGA |
| hsa-1474228 | Degradation of the extracellular matrix | 18 | 140 | 1.44 | 5.79E-18 | DCN, TIMP1, MMP2, COL1A1, LAMC1, TIMP2, COL6A3, COL1A2, COL6A2, COL3A1, A2M, COL12A1, CTSB, FN1, COL6A1, COL5A1, COL5A2, COL2A1 |
| hsa-3000171 | Non-integrin membrane-ECM interactions | 12 | 59 | 1.64 | 1.03E-13 | COL1A1, VTN, LAMC1, THBS1, COL1A2, COL3A1, FN1, COL5A1, COL5A2, AGRN, COL2A1, ACTN1 |
| hsa-2022090 | Assembly of collagen fibrils and other multimeric structures | 12 | 61 | 1.62 | 1.34E-13 | PCOLCE, COL1A1, COL6A3, COL1A2, COL6A2, COL3A1, COL12A1, CTSB, COL6A1, COL5A1, COL5A2, COL2A1 |
| hsa-1442490 | Collagen degradation | 12 | 64 | 1.6 | 2.07E-13 | MMP2, COL1A1, COL6A3, COL1A2, COL6A2, COL3A1, COL12A1, CTSB, COL6A1, COL5A1, COL5A2, COL2A1 |
| hsa-3000170 | Syndecan interactions | 9 | 27 | 1.85 | 8.77E-12 | COL1A1, VTN, THBS1, COL1A2, COL3A1, FN1, COL5A1, COL5A2, ACTN1 |
| hsa-8948216 | Collagen chain trimerization | 10 | 44 | 1.69 | 8.77E-12 | COL1A1, COL6A3, COL1A2, COL6A2, COL3A1, COL12A1, COL6A1, COL5A1, COL5A2, COL2A1 |
| hsa-1650814 | Collagen biosynthesis and modifying enzymes | 11 | 67 | 1.55 | 9.57E-12 | PCOLCE, COL1A1, COL6A3, COL1A2, COL6A2, COL3A1, COL12A1, COL6A1, COL5A1, COL5A2, COL2A1 |
| hsa-8874081 | MET activates PTK2 signaling | 8 | 30 | 1.76 | 8.84E-10 | COL1A1, LAMC1, COL1A2, COL3A1, FN1, COL5A1, COL5A2, COL2A1 |
| hsa-186797 | Signaling by PDGF | 9 | 58 | 1.52 | 2.80E-09 | THBS1, COL6A3, COL6A2, COL3A1, COL6A1, THBS2, COL5A1, COL5A2, COL2A1 |
| hsa-419037 | NCAM1 interactions | 8 | 42 | 1.61 | 7.95E-09 | COL6A3, COL6A2, COL3A1, COL6A1, COL5A1, COL5A2, AGRN, COL2A1 |
| hsa-168256 | Immune System | 32 | 1979 | 0.54 | 1.73E-08 | TIMP1, MMP2, COL1A1, VTN, C3, ORM1, TIMP2, A1BG, PTX3, COL1A2, COL3A1, FGB, CLU, FGG, CTSB, FN1, HP, QSOX1, FLNA, HSP90AB1, COL2A1, FSCN1, YWHAZ, ORM2, C4B, SERPINA1, HSPA8, KPNA2, C1R, VIM, SERPINA3, FGA |
| hsa-2173782 | Binding and Uptake of Ligands by Scavenger Receptors | 7 | 43 | 1.54 | 3.00E-07 | COL1A1, SPARC, APOA1, HPX, COL1A2, COL3A1, HP |
| hsa-9006934 | Signaling by Receptor Tyrosine Kinases | 15 | 521 | 0.79 | 2.15E-06 | COL1A1, SPARC, HSPB1, LAMC1, THBS1, COL6A3, COL1A2, COL6A2, COL3A1, FN1, COL6A1, THBS2, COL5A1, COL5A2, COL2A1 |
| hsa-76009 | Platelet Aggregation (Plug Formation) | 6 | 39 | 1.52 | 5.09E-06 | COL1A1, COL1A2, FGB, FGG, FN1, FGA |
| hsa-168249 | Innate Immune System | 20 | 1041 | 0.61 | 5.50E-06 | VTN, C3, ORM1, TIMP2, A1BG, PTX3, FGB, CLU, FGG, CTSB, HP, QSOX1, HSP90AB1, ORM2, C4B, SERPINA1, HSPA8, C1R, SERPINA3, FGA |
| hsa-162582 | Signal Transduction | 31 | 2540 | 0.42 | 2.06E-05 | MMP2, SERPINE1, COL1A1, SPARC, C3, HSPB1, LAMC1, THBS1, COL6A3, FSTL1, COL1A2, COL6A2, COL3A1, FGB, H2AC20, FGG, FN1, COL6A1, THBS2, FLNA, HSP90AB1, COL5A1, COL5A2, COL2A1, YWHAQ, ACTN1, YWHAZ, KPNA2, VIM, MYL6, FGA |
| hsa-422475 | Axon guidance | 14 | 551 | 0.74 | 2.52E-05 | MMP2, LAMC1, COL6A3, COL6A2, COL3A1, RPLP1, COL6A1, HSP90AB1, COL5A1, COL5A2, AGRN, COL2A1, HSPA8, MYL6 |
| hsa-6798695 | Neutrophil degranulation | 13 | 476 | 0.77 | 3.03E-05 | C3, ORM1, TIMP2, A1BG, PTX3, CTSB, HP, QSOX1, HSP90AB1, ORM2, SERPINA1, HSPA8, SERPINA3 |
| hsa-430116 | GP1b-IX-V activation signalling | 4 | 12 | 1.85 | 5.27E-05 | COL1A1, COL1A2, FLNA, YWHAZ |
| hsa-6785807 | Interleukin-4 and Interleukin-13 signaling | 7 | 107 | 1.15 | 6.87E-05 | TIMP1, MMP2, COL1A2, FN1, FSCN1, HSPA8, VIM |
| hsa-354194 | GRB2:SOS provides linkage to MAPK signaling for Integrins | 4 | 15 | 1.76 | 0.0001 | FGB, FGG, FN1, FGA |
| hsa-372708 | p130Cas linkage to MAPK signaling for integrins | 4 | 15 | 1.76 | 0.0001 | FGB, FGG, FN1, FGA |
| hsa-392499 | Metabolism of proteins | 25 | 1917 | 0.45 | 0.00011 | TIMP1, MMP2, APOA1, C3, APCS, LAMC1, THBS1, CP, VCAN, CDH2, FSTL1, IGFBP7, H2AC20, FGG, RPLP1, FN1, THBS2, QSOX1, APOA2, GOLM1, TF, SERPINA1, TGFBI, HSPA8, FGA |
| hsa-597592 | Post-translational protein modification | 21 | 1405 | 0.51 | 0.00011 | TIMP1, APOA1, C3, LAMC1, THBS1, CP, VCAN, CDH2, FSTL1, IGFBP7, H2AC20, FGG, FN1, THBS2, QSOX1, APOA2, GOLM1, TF, SERPINA1, HSPA8, FGA |
| hsa-3000480 | Scavenging by Class A Receptors | 4 | 18 | 1.68 | 0.00018 | COL1A1, APOA1, COL1A2, COL3A1 |
| hsa-977606 | Regulation of Complement cascade | 5 | 49 | 1.34 | 0.00029 | VTN, C3, CLU, C4B, C1R |
| hsa-1266738 | Developmental Biology | 17 | 1108 | 0.52 | 0.00078 | MMP2, LAMC1, CDH2, COL6A3, COL6A2, COL3A1, H2AC20, RPLP1, COL6A1, HSP90AB1, COL5A1, COL5A2, AGRN, COL2A1, HSPA8, MYL6, CDH4 |
| hsa-6802948 | Signaling by high-kinase activity BRAF mutants | 4 | 36 | 1.38 | 0.0018 | FGB, FGG, FN1, FGA |
| hsa-140877 | Formation of Fibrin Clot (Clotting Cascade) | 4 | 39 | 1.34 | 0.0023 | FGB, A2M, FGG, FGA |
| hsa-977225 | Amyloid fiber formation | 5 | 79 | 1.13 | 0.0023 | APOA1, APCS, H2AC20, TGFBI, FGA |
| hsa-5674135 | MAP2K and MAPK activation | 4 | 40 | 1.33 | 0.0025 | FGB, FGG, FN1, FGA |
| hsa-3560782 | Diseases associated with glycosaminoglycan metabolism | 4 | 41 | 1.32 | 0.0027 | DCN, VCAN, LUM, AGRN |
| hsa-9656223 | Signaling by RAF1 mutants | 4 | 41 | 1.32 | 0.0027 | FGB, FGG, FN1, FGA |
| hsa-3781865 | Diseases of glycosylation | 6 | 144 | 0.95 | 0.0032 | DCN, THBS1, VCAN, LUM, THBS2, AGRN |
| hsa-5653656 | Vesicle-mediated transport | 12 | 666 | 0.59 | 0.0032 | COL1A1, SPARC, APOA1, HPX, COL1A2, COL3A1, HP, YWHAQ, YWHAZ, TF, SERPINA1, HSPA8 |
| hsa-2168880 | Scavenging of heme from plasma | 3 | 15 | 1.63 | 0.0033 | APOA1, HPX, HP |
| hsa-6802946 | Signaling by moderate kinase activity BRAF mutants | 4 | 45 | 1.28 | 0.0034 | FGB, FGG, FN1, FGA |
| hsa-6802955 | Paradoxical activation of RAF signaling by kinase inactive BRAF | 4 | 45 | 1.28 | 0.0034 | FGB, FGG, FN1, FGA |
| hsa-9649948 | Signaling downstream of RAS mutants | 4 | 45 | 1.28 | 0.0034 | FGB, FGG, FN1, FGA |
| hsa-1643685 | Disease | 20 | 1702 | 0.4 | 0.0041 | DCN, APOA1, C3, THBS1, CP, VCAN, LUM, FGB, H2AC20, FGG, RPLP1, FN1, THBS2, HSP90AB1, AGRN, YWHAQ, YWHAZ, TXNRD1, KPNA2, FGA |
| hsa-5602498 | MyD88 deficiency (TLR2/4) | 3 | 17 | 1.58 | 0.0041 | FGB, FGG, FGA |
| hsa-2243919 | Crosslinking of collagen fibrils | 3 | 18 | 1.55 | 0.0047 | PCOLCE, COL1A1, COL1A2 |
| hsa-5603041 | IRAK4 deficiency (TLR2/4) | 3 | 18 | 1.55 | 0.0047 | FGB, FGG, FGA |
| hsa-8963898 | Plasma lipoprotein assembly | 3 | 19 | 1.53 | 0.0053 | APOA1, A2M, APOA2 |
| hsa-3560783 | Defective B4GALT7 causes EDS, progeroid type | 3 | 20 | 1.51 | 0.0059 | DCN, VCAN, AGRN |
| hsa-3560801 | Defective B3GAT3 causes JDSSDHD | 3 | 20 | 1.51 | 0.0059 | DCN, VCAN, AGRN |
| hsa-4420332 | Defective B3GALT6 causes EDSP2 and SEMDJL1 | 3 | 20 | 1.51 | 0.0059 | DCN, VCAN, AGRN |
| hsa-5686938 | Regulation of TLR by endogenous ligand | 3 | 20 | 1.51 | 0.0059 | FGB, FGG, FGA |
| hsa-140875 | Common Pathway of Fibrin Clot Formation | 3 | 22 | 1.47 | 0.0072 | FGB, FGG, FGA |
| hsa-9613829 | Chaperone Mediated Autophagy | 3 | 22 | 1.47 | 0.0072 | HSP90AB1, HSPA8, VIM |
| hsa-166663 | Initial triggering of complement | 3 | 24 | 1.43 | 0.0088 | C3, C4B, C1R |
| hsa-5625740 | RHO GTPases activate PKNs | 4 | 63 | 1.13 | 0.0089 | H2AC20, YWHAQ, YWHAZ, MYL6 |
| hsa-6802952 | Signaling by BRAF and RAF1 fusions | 4 | 65 | 1.12 | 0.0098 | FGB, FGG, FN1, FGA |
| hsa-1971475 | A tetrasaccharide linker sequence is required for GAG synthesis | 3 | 26 | 1.39 | 0.0105 | DCN, VCAN, AGRN |
| hsa-198933 | Immunoregulatory interactions between a Lymphoid and a non-Lymphoid cell | 5 | 130 | 0.92 | 0.0133 | COL1A1, C3, COL1A2, COL3A1, COL2A1 |
| hsa-5336415 | Uptake and function of diphtheria toxin | 2 | 6 | 1.85 | 0.0179 | HSP90AB1, TXNRD1 |
| hsa-1592389 | Activation of Matrix Metalloproteinases | 3 | 33 | 1.29 | 0.0187 | TIMP1, MMP2, TIMP2 |
| hsa-9706574 | RHOBTB GTPase Cycle | 3 | 35 | 1.26 | 0.0213 | HSP90AB1, ACTN1, VIM |
| hsa-174577 | Activation of C3 and C5 | 2 | 7 | 1.79 | 0.0218 | C3, C4B |
| hsa-2129379 | Molecules associated with elastic fibres | 3 | 37 | 1.24 | 0.0242 | VTN, FN1, EMILIN1 |
| hsa-3595172 | Defective CHST3 causes SEDCJD | 2 | 8 | 1.73 | 0.0265 | DCN, VCAN |
| hsa-3595174 | Defective CHST14 causes EDS, musculocontractural type | 2 | 8 | 1.73 | 0.0265 | DCN, VCAN |
| hsa-3595177 | Defective CHSY1 causes TPBS | 2 | 8 | 1.73 | 0.0265 | DCN, VCAN |
| hsa-8963896 | HDL assembly | 2 | 8 | 1.73 | 0.0265 | APOA1, A2M |
| hsa-446728 | Cell junction organization | 4 | 92 | 0.97 | 0.0282 | CDH2, FLNA, ACTN1, CDH4 |
| hsa-449147 | Signaling by Interleukins | 8 | 453 | 0.58 | 0.0357 | TIMP1, MMP2, COL1A2, FN1, FSCN1, YWHAZ, HSPA8, VIM |
| hsa-8963888 | Chylomicron assembly | 2 | 10 | 1.63 | 0.0357 | APOA1, APOA2 |
| hsa-8963901 | Chylomicron remodeling | 2 | 10 | 1.63 | 0.0357 | APOA1, APOA2 |
| hsa-975634 | Retinoid metabolism and transport | 3 | 44 | 1.16 | 0.0357 | APOA1, APOA2, AGRN |
| hsa-2022923 | Dermatan sulfate biosynthesis | 2 | 11 | 1.59 | 0.04 | DCN, VCAN |
| hsa-1280215 | Cytokine Signaling in Immune system | 10 | 706 | 0.48 | 0.0437 | TIMP1, MMP2, COL1A2, FN1, FLNA, FSCN1, YWHAZ, HSPA8, KPNA2, VIM |
| hsa-9614399 | Regulation of localization of FOXO transcription factors | 2 | 12 | 1.55 | 0.0451 | YWHAQ, YWHAZ |
| hsa-9755779 | SARS-CoV-2 targets host intracellular signalling and regulatory pathways | 2 | 12 | 1.55 | 0.0451 | YWHAQ, YWHAZ |

## miRNA profiling of sEVs

Upon aligning data to the genome reference database, 245 known miRNAs and 34 novel miRNAs were detected. A Venn diagram was used to visualize the overlap between the known miRNAs identified in this study and those in the ExoCarta and Vesiclepedia databases. Figure S3A shows that 209 miRNAs identified from UC-MSC-sEVs overlapped with Vesiclepedia, 198 overlapped with ExoCarta, and 188 were common to both databases. Additionally, 21 miRNAs uniquely overlapped with Vesiclepedia compared to MSC-sEVs, while 10 miRNAs uniquely overlapped with ExoCarta (Table S4). Furthermore, 26 miRNAs from MSC-sEVs did not overlap with either database.

A total of 226 miRNAs from 245 known miRNA were successfully converted into version 21 miRBase and used for subsequent analysis in miEAA analysis tools. In term of localization (RNALocate), the observed counts of miRNA presence were mostly in microvesicle and exosome. Functional analysis showed the involvement of these miRNAs in various cellular processes and molecular functions, including protein binding, DNA binding, and regulation of transcriptional activities. They also showed potential roles in processes such as cell division, proliferation, apoptosis, and differentiation, indicating their impact on cellular functions. Gene ontology analysis highlighted enrichment in biological processes related to transcriptional regulation, apoptosis, DNA-templated transcription, cell proliferation, and signal transduction. The coexistence of both negative and positive regulation of DNA-templated transcription and cell proliferation underscores the complexity of these interconnected cellular processes. Signal transduction and protein phosphorylation suggest a broad influence on cellular functions, encompassing protein synthesis, cell division, and growth. In KEGG pathway, sEVs protein were enriched in P13K-AKT pathway and MAPK signaling pathway. While in miRWalk pathway prediction, focal adhesion, MAPK signaling pathway, and androgen receptor signaling pathway were within top 10 enriched categories. In summary, miRNAs within MSC-sEVs exhibit diverse roles in regulating gene expression and cellular processes.

The roles of miRNAs identified in sEVs in ECM remodeling and melanogenesis were listed in Table S5 and S6.


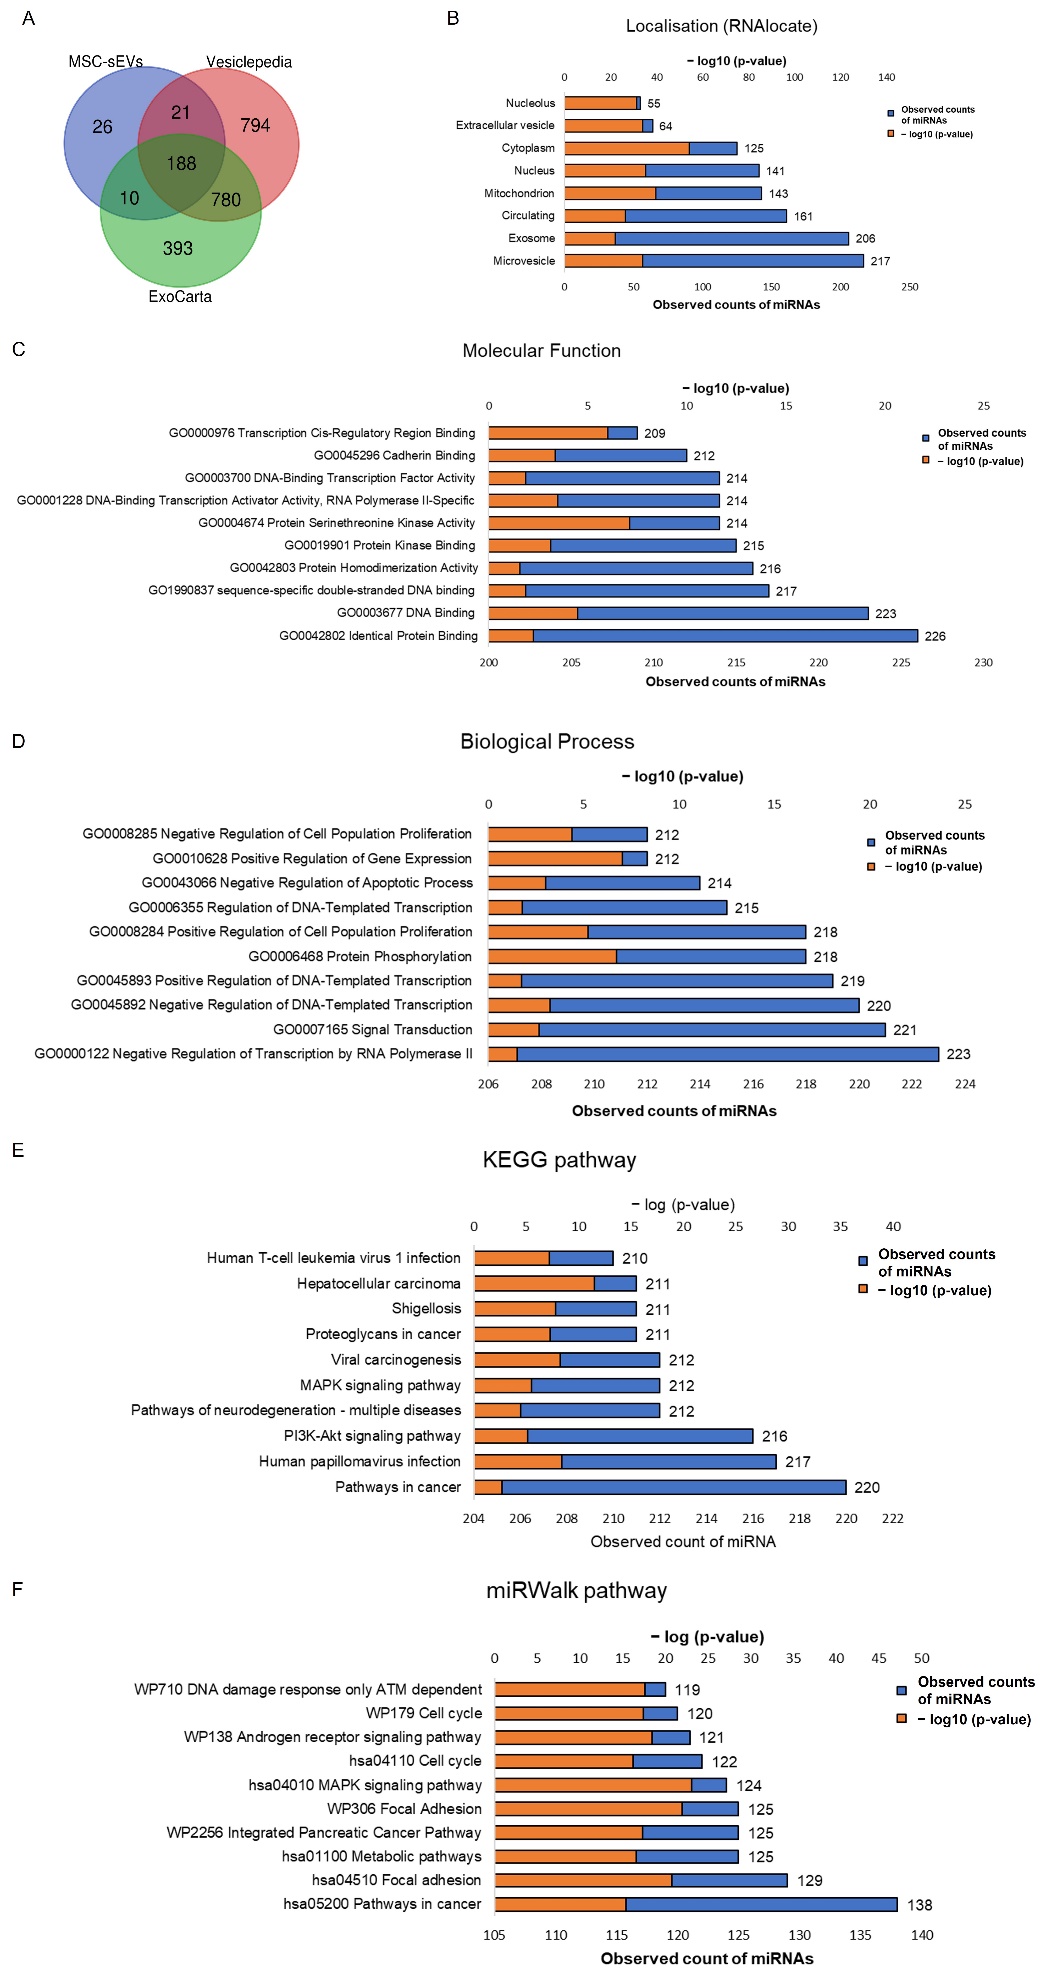


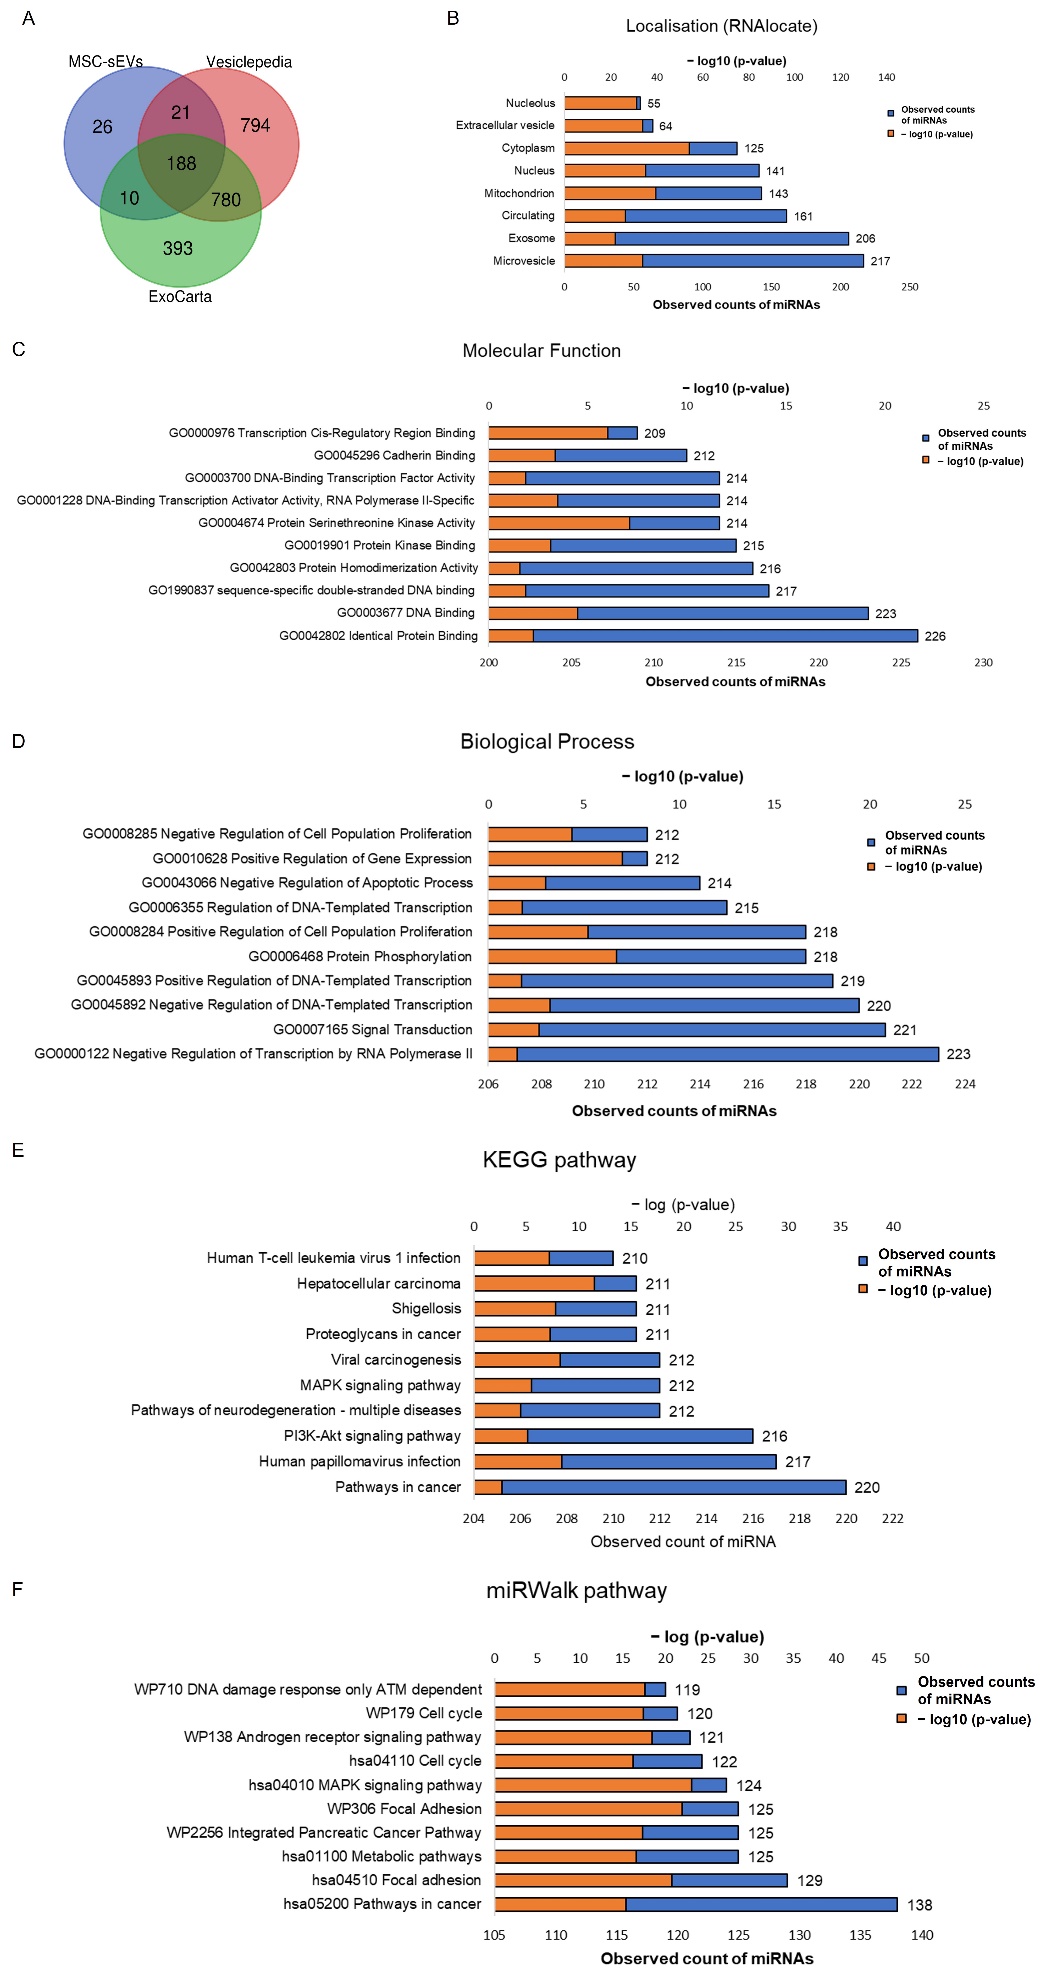


**Figure S3:** miRNA profiling of sEVs. (A) Venn diagram illustrating the overlap of miRNAs identified in ExoCarta, Vesiclepedia, and MSC-sEVs. (B–F) Top localization, molecular function, and biological process identified using miEAA analysis tools, as well as KEGG pathway and miRWalk pathway analyses.

**Table S4:** Identified miRNA of sEVs from this study

| **MSC-sEVs that overlapped with ExoCarta and Vesiclepedia** | | | | | | | |
| --- | --- | --- | --- | --- | --- | --- | --- |
| hsa-miR-381-3p | hsa-miR-18a-5p | hsa-miR-183-5p | | | hsa-miR-146b-5p | hsa-miR-337-3p | |
| hsa-miR-23a-3p | hsa-miR-374a-5p | hsa-miR-501-3p | | | hsa-miR-378a-3p | hsa-miR-660-5p | |
| hsa-miR-146a-5p | hsa-miR-10a-5p | hsa-miR-214-3p | | | hsa-miR-15b-5p | hsa-miR-582-3p | |
| hsa-miR-496 | hsa-miR-101-3p | hsa-miR-21-5p | | | hsa-let-7f-5p | hsa-miR-942-5p | |
| hsa-miR-320c | hsa-miR-193b-3p | hsa-miR-197-3p | | | hsa-let-7d-5p | hsa-miR-98-5p | |
| hsa-miR-424-3p | hsa-miR-24-3p | hsa-miR-145-5p | | | hsa-miR-30e-5p | hsa-miR-29a-3p | |
| hsa-miR-330-3p | hsa-miR-625-3p | hsa-miR-30d-5p | | | hsa-miR-1271-5p | hsa-miR-362-5p | |
| hsa-miR-574-3p | hsa-miR-138-5p | hsa-miR-17-5p | | | hsa-miR-130b-5p | hsa-miR-505-3p | |
| hsa-let-7b-5p | hsa-miR-380-3p | hsa-miR-92b-3p | | | hsa-miR-144-5p | hsa-miR-15a-5p | |
| hsa-miR-30a-5p | hsa-miR-181b-5p | hsa-miR-377-5p | | | hsa-miR-340-5p | hsa-miR-432-5p | |
| hsa-miR-136-3p | hsa-miR-196b-5p | hsa-miR-193a-5p | | | hsa-miR-485-3p | hsa-miR-502-5p | |
| hsa-miR-543 | hsa-miR-3909 | hsa-miR-500a-5p | | | hsa-miR-25-3p | hsa-miR-503-5p | |
| hsa-miR-151b | hsa-miR-431-5p | hsa-miR-744-5p | | | hsa-miR-455-3p | hsa-miR-1260b | |
| hsa-miR-106b-5p | hsa-miR-421 | hsa-miR-758-3p | | | hsa-miR-425-5p | hsa-miR-1262 | |
| hsa-let-7g-5p | hsa-miR-148a-3p | hsa-miR-3173-5p | | | hsa-miR-181c-5p | hsa-miR-29c-5p | |
| hsa-miR-106a-5p | hsa-miR-484 | hsa-miR-223-3p | | | hsa-miR-140-3p | hsa-miR-374b-5p | |
| hsa-miR-1296-5p | hsa-miR-95-3p | hsa-miR-769-5p | | | hsa-miR-369-3p | hsa-miR-125b-5p | |
| hsa-miR-328-3p | hsa-miR-222-3p | hsa-miR-19a-3p | | | hsa-miR-132-3p | hsa-miR-135b-5p | |
| hsa-miR-127-3p | hsa-miR-149-5p | hsa-miR-342-3p | | | hsa-miR-130a-3p | hsa-miR-195-5p | |
| hsa-miR-23b-3p | hsa-miR-221-3p | hsa-miR-584-5p | | | hsa-miR-142-3p | hsa-miR-450b-5p | |
| hsa-miR-31-5p | hsa-miR-652-3p | hsa-miR-200c-3p | | | hsa-miR-27a-3p | hsa-miR-299-3p | |
| hsa-miR-376c-3p | hsa-miR-3158-3p | hsa-miR-1307-3p | | | hsa-miR-671-5p | hsa-miR-3174 | |
| hsa-miR-30b-5p | hsa-miR-452-5p | hsa-miR-323b-3p | | | hsa-miR-490-5p | hsa-miR-194-5p | |
| hsa-miR-139-5p | hsa-miR-494-3p | hsa-miR-26b-5p | | | hsa-miR-185-5p | hsa-let-7e-5p | |
| hsa-miR-126-3p | hsa-miR-215-5p | hsa-miR-532-5p | | | hsa-miR-9-5p | hsa-miR-181a-5p | |
| hsa-miR-103a-3p | hsa-miR-628-5p | hsa-miR-20a-5p | | | hsa-miR-125a-5p | hsa-miR-320b | |
| hsa-miR-224-5p | hsa-miR-345-5p | hsa-miR-2355-3p | | | hsa-miR-99a-5p | hsa-miR-192-5p | |
| hsa-miR-499a-5p | hsa-miR-199a-3p | hsa-miR-148b-3p | | | hsa-miR-196a-5p | hsa-let-7c-5p | |
| hsa-miR-339-5p | hsa-miR-32-3p | hsa-miR-590-3p | | | hsa-miR-493-5p | hsa-miR-199b-3p | |
| hsa-miR-186-5p | hsa-miR-708-5p | hsa-miR-100-5p | | | hsa-miR-629-5p | hsa-miR-454-3p | |
| hsa-miR-486-5p | hsa-miR-34a-5p | hsa-miR-361-5p | | | hsa-miR-181d-5p | hsa-miR-107 | |
| hsa-miR-218-5p | hsa-miR-335-5p | hsa-let-7i-5p | | | hsa-miR-28-5p | hsa-miR-212-5p | |
| hsa-miR-93-5p | hsa-miR-26a-5p | hsa-miR-654-3p | | | hsa-miR-323a-3p | hsa-miR-27b-3p | |
| hsa-miR-365b-3p | hsa-let-7a-5p | hsa-miR-324-5p | | | hsa-miR-182-5p | hsa-miR-16-5p | |
| hsa-miR-155-5p | hsa-miR-7-5p | hsa-miR-143-3p | | | hsa-miR-3143 | hsa-miR-7706 | |
| hsa-miR-22-3p | hsa-miR-382-5p | hsa-miR-10b-5p | | | hsa-miR-30c-5p | hsa-miR-191-5p | |
| hsa-miR-365a-3p | hsa-miR-495-3p | hsa-miR-423-3p | | | hsa-miR-615-3p |  | |
| hsa-miR-589-5p | hsa-miR-409-3p | hsa-miR-376b-3p | | | hsa-miR-92a-3p |  | |
| **Extra MSC-sEVs that overlapped with Vesiclepedia** | | | | | | |
| hsa-miR-92a-1-3p | hsa-miR-3194-3p | | hsa-miR-1185-5p | hsa-miR-656-3p | | hsa-miR-889-3p |
| hsa-miR-487b-3p | hsa-miR-329-3p | | hsa-miR-433-3p | hsa-miR-651-5p | | hsa-miR-374c-5p |
| hsa-miR-370-3p | hsa-miR-548e-3p | | hsa-miR-487a-3p | hsa-miR-5189-3p | | hsa-miR-3940-3p |
| hsa-miR-627-3p | hsa-miR-410-3p | | hsa-miR-29b-1-3p | hsa-miR-134-5p | | hsa-miR-152-3p |
| hsa-miR-3912-3p |  | |  |  | |  |
| **MSC-sEVs that not overlapped with database** | | | | | | |
| hsa-miR-4659a-3p | hsa-miR-24-2-3p | | hsa-miR-605-3p | hsa-miR-29b-2-3p | | hsa-miR-376a-2-3p |
| hsa-miR-3619-5p | hsa-miR-137-3p | | hsa-miR-320a-3p | hsa-miR-4636 | | hsa-miR-3145-5p |
| hsa-miR-19b-1-3p | hsa-miR-92a-2-3p | | hsa-miR-128-2-3p | hsa-miR-128-1-3p | | hsa-miR-101-2-3p |
| hsa-miR-103a-2-3p | hsa-miR-2682-5p | | hsa-miR-103a-1-3p | hsa-miR-3159 | | hsa-miR-24-1-3p |
| hsa-miR-19b-2-3p | hsa-miR-1-3p | | hsa-miR-1185-3p | hsa-miR-217-5p | | hsa-miR-550a-3-3p |
| hsa-miR-3117-3p |  | |  |  | |  |

**Table S5:** miRNA of sEVs involved in ECM remodeling.

| **Target Gene** | **miRNA** | **Mature read count** | **Function** | **Reference** |
| --- | --- | --- | --- | --- |
| **TGF-β/SMAD signaling pathway** | | | | |
| COLI | let-7a | 4507 | ↓ COLI synthesis | 9 |
| TGF-βR1  TGF-βR2 | let-7-5p | 454 | ↓α-SMA expression | 10 |
| miR-22-3p | 534 |
| miR-27a-3p | 574 |
| miR-21-5p | 52773 |
| miR-23a-3p | 78 |
| SMAD2  TGF-b2  TGF-bR2 | hsa-miR-125b-5p | 8179 | suppressing myofibroblast formation by inhibiting α-SMA and collagen deposition | 11 |
| miR-21 | 52773 |
| miR-23a | 78 |
| miR-145 | 88 |
| TGF-β1 | miR-425-5p | 215 | ↓ TGF-β1 expression and inhibit myofibroblast differentiation | 12. |
| miR-142-3p | 44 |
| SMAD2/3 | miR-145-5p | 88 | ↓ SMAD2/3 level  ↓ HSFs’ activation and proliferation  ↑ HSFs apoptosis | 13 |
| SMAD4 | miR-146a | 602 | ↓ TGF-β1-induced α-SMA expression/ trans-differentiation | 14 |
| TGF-β1  Col-1 | miR-185 | 53 | ↓ TGF-β1 and COLI protein expression | 15 |
| TGF-β2 | miR-29a | 6084 | Inhibit α-SMA, COLI and COLIII expression | 16 |
| IL-17RA | miR-192-5p | 31 | ↓ IL-17RA, COLI,COLIII and α-SMA protein level | 17 |
| SIP1 | miR-192 | 31 | ↑ COLI, COLIII and α-SMA level | 18 |
| EZH2 | miR101 | 108 | ↓ COL and α-SMA expression | 19 |
| SMAD7 | miR-21 | 52773 | ↑ COLI | 20  21 |
| SMURF2 | miR‐411‐3p | 169 | Inhibit COL, F‐actin expression and TGF‐β/Smad signaling | 22 |
| TGFBR2 | miR-9-5p | 6 | ↓ COLIα1, FN and α-SMA protein expression | 23 |
| **PI3K/AKT signaling pathway** | | | | |
| CYLD | miR-130a | 13 | ↑ COLI/III and α-SMA expression  ↓ cell proliferation  inhibit Akt activity | 24 |
| SHIP1 | miR-155 | 625 | ↑ cell proliferation, COLI and COLIII expressions  activate PI3K/Akt pathway | 25 |
| PTEN | miR-181a | 509 | ↑ COL1 and COLIII expression  Regulates HSF proliferation and apoptosis | 26 |
| PTEN  SPRY1 | miR-21 | 52773 | ↑ fibroblast proliferation and migration  Mediate pro-angiogenic effects | 27 |
| **Other pathway** | | | | |
| NA | miR-127-3p | 440 | Induces a cell cycle arrest in myofibroblasts  ↑ inflammation and ECM degradation. | 28 |
| RASA1 | miR-132 | 30 | ↑ fibroblast migration | 29 |
| KLF4 | miR-145 | 88 | ↑ COLIα1 and TGF-β1 secretion, contractile force generation, and migration in myofibroblasts | 30 |
| PDGFRa | miR-146b-5p | 106 | ↓ COLI, COLIII, COLIV, SMAD3, and αSMA expression  ↓ angiogenesis | 31 |
| PDCD4 | miR-21 | 52773 | ↑ myofibroblast differentiation | 32 |
| ASK1 | miR-23b | 518 | ↑ α-SMA, COLIα1 and COLIIIα1 expression  ↓ inflammation to ↑ wound healing | 33 |
| IGF1R  mTOR  AKT1 | miR-99 | 279 | ↓cell proliferation and cell migration  ↑apoptosis | 34 |

**Table S6:** miRNA in sEVs involved in melanogenesis.

| **Target** | **miRNA** | **Mature read count** | **Result** | **Reference** |
| --- | --- | --- | --- | --- |
| MITF | miR-125b-5p | 8183 | ↓ MITF expression, TYR, TYRP1, TYRP2, and DCT protein level  ↓ cell proliferation activity  ↑ apoptosis | 35 |
| miR-25 | 409 | ↓ MITF, TYR and TYRP1 | 36 |
| miR-181a-5p | 509 | ↓ MITF, TYR, TYRP1, TYRP2 | 37 |
| miR-183 | 6 | ↓ TYR, TYRP1, DCT, melanin and eumelanin production. | 38 |
| miR-218 | 271 | ↓ MITF expression, TYR activity, and induced depigmentation | 39 |
| miR-340 | 111 | ↓MITF expression, melanin amount, TYR and TYRP1 expression | 40 |
| Myo5a | miR-145 | 88 | ↓ Sox9, MITF, TYR, TYRP1, Myo5a, Rab27a and Fscn1 expression  inhibits melanosome transport and induces depigmentation | 41 |
| Wnt3a | miR-27-3p | 574 | ↓Wnt3a protein expression and melanin content | 42 |
| IGF1R | miR-379 | 241 | ↓melanocyte migration by ↓ FAK  ↑ melanocyte proliferation by ↑ protein kinase B (AKT)  ↓ CREB and MITF, as well as TYR, TYRP1, and TYRP2 levels | 43 |
| SOX6 | miR-380-3p | 6 | ↓ MITF, TYR, TYRP1, and DCT level. | 44 |
| riPK1 | mir-421 | 22 | ↓ melanocytes viability and ↑ melanocytes apoptosis through regulating PI3K/AKT/mTOR signaling and ER stress signaling | 45 |
| mTOR | miR‑199a | 6655 | ↑ melanosome degradation by autophagy induction | 37 |
| NA | miR-21 | 52733 | ↓ melanin synthesis through EGFR/Akt pathway-mediated suppression of α-MSH. | 46. |
| multiple targets | miR-155 | 625 | ↓ TYRP1, YWHAE, SDCBP and SOX10 in melanocytes, and YWHAE in keratinocytes to affect melanocyte differentiation and melanogenesis | 47 |

# Reference

1. Huang DW, Sherman BT, Lempicki RA. Systematic and integrative analysis of large gene lists using DAVID bioinformatics resources. *Nat Protoc*. 2009;4(1):44-57. doi:10.1038/nprot.2008.211

2. Sherman BT, Hao M, Qiu J, et al. DAVID: a web server for functional enrichment analysis and functional annotation of gene lists (2021 update). *Nucleic Acids Res*. 2022;50(W1):W216-W221. doi:10.1093/nar/gkac194

3. Keerthikumar S, Chisanga D, Ariyaratne D, et al. ExoCarta: a web-based compendium of exosomal cargo. *J Mol Biol*. 2016;428(4):688-692. doi:10.1016/j.jmb.2015.09.019

4. Mathivanan S, Fahner CJ, Reid GE, Simpson RJ. ExoCarta 2012: Database of exosomal proteins, RNA and lipids. *Nucleic Acids Res*. 2012;40(D1):1241-1244. doi:10.1093/nar/gkr828

5. Kalra H, Simpson RJ, Ji H, et al. Vesiclepedia:a compendium for extracellular vesicles with continuous community annotation. *PLoS Biol*. 2012;10(12):8-12. doi:10.1371/journal.pbio.1001450

6. Pathan M, Fonseka P, Chitti S V., et al. Vesiclepedia 2019: A compendium of RNA, proteins, lipids and metabolites in extracellular vesicles. *Nucleic Acids Res*. 2019;47(D1):D516-D519. doi:10.1093/nar/gky1029

7. Aparicio-Puerta E, Hirsch P, Schmartz GP, Kern F, Fehlmann T, Keller A. MiEAA 2023: Updates, new functional microRNA sets and improved enrichment visualizations. *Nucleic Acids Res*. 2023;51(1 W):W319-W325. doi:10.1093/nar/gkad392

8. Szklarczyk D, Gable AL, Nastou KC, et al. The STRING database in 2021: customizable protein–protein networks, and functional characterization of user-uploaded gene/measurement sets. *Nucleic Acids Res*. 2021;49(18):10800-10800. doi:10.1093/nar/gkab835

9. Makino K, Jinnin M, Hirano A, et al. The Downregulation of microRNA let-7a Contributes to the Excessive Expression of Type I Collagen in Systemic and Localized Scleroderma. *J Immunol*. 2013;190(8):3905-3915. doi:10.4049/jimmunol.1200822

10. Zhang Y, Yan J, Liu Y, et al. Human amniotic fluid stem cell-derived exosomes as a novel cell-free therapy for cutaneous regeneration. *Front Cell Dev Biol*. 2021;9(June):1-14. doi:10.3389/fcell.2021.685873

11. Fang S, Xu C, Zhang Y, et al. Umbilical Cord-Derived Mesenchymal Stem Cell-Derived Exosomal MicroRNAs Suppress Myofibroblast Differentiation by Inhibiting the Transforming Growth Factor-β/SMAD2 Pathway During Wound Healing. *Stem Cells Transl Med*. 2016;5(10):1425-1439. doi:10.5966/sctm.2015-0367

12. Duan M, Zhang Y, Zhang H, Meng Y, Qian M, Zhang G. Epidermal stem cell-derived exosomes promote skin regeneration by downregulating transforming growth factor-β1 in wound healing. *Stem Cell Res Ther*. 2020;11(1):1-11. doi:10.1186/s13287-020-01971-6

13. Shen W, Wang Y, Wang D, Zhou H, Zhang H, Li L. miR-145-5p attenuates hypertrophic scar via reducing Smad2/Smad3 expression. *Biochem Biophys Res Commun*. 2020;521(4):1042-1048. doi:10.1016/j.bbrc.2019.11.040

14. Liu Z, Lu CL, Hu YL, et al. MicroRNA-146a modulates TGF-β1-induced phenotypic differentiation in human dermal fibroblasts by targeting SMAD4. *Arch Dermatol Res*. 2012;304(3):195-202. doi:10.1007/s00403-011-1178-0

15. Xiao K, Luo X, Wang X, Gao Z. MicroRNA-185 regulates transforming growth factor-β1 and collagen-1 in hypertrophic scar fibroblasts. *Mol Med Rep*. 2017;15(4):1489-1496. doi:10.3892/mmr.2017.6179

16. Yuan R, Dai X, Li Y, Li C, Liu L. Exosomes from miR-29a-modified adipose-derived mesenchymal stem cells reduce excessive scar formation by inhibiting TGF-β2/Smad3 signaling. *Mol Med Rep*. 2021;24(5). doi:10.3892/mmr.2021.12398

17. Li Y, Zhang J, Shi J, et al. Exosomes derived from human adipose mesenchymal stem cells attenuate hypertrophic scar fibrosis by miR-192-5p/IL-17RA/Smad axis. *Stem Cell Res Ther*. 2021;12(1):1-16. doi:10.1186/s13287-021-02290-0

18. Li Y, Zhang J, Zhang W, et al. MicroRNA-192 regulates hypertrophic scar fibrosis by targeting SIP1. *J Mol Histol*. 2017;48(5-6):357-366. doi:10.1007/s10735-017-9734-3

19. Li J, Li Y, Wang Y, et al. Overexpression of miR-101 suppresses collagen synthesis by targeting EZH2 in hypertrophic scar fibroblasts. *Burn Trauma*. 2021;9:1-12. doi:10.1093/burnst/tkab038

20. Parida S, Kaufmann SHE. MiR-21 Regulates Keloid Formation by Downregulating Smad7 via the TGF-β/Smad Signaling Pathway. Published online 2018:1-39. doi:10.1093/asj/sjy179/5059000

21. Wang T, Feng Y, Sun H, et al. MiR-21 regulates skin wound healing by targeting multiple aspects of the healing process. *Am J Pathol*. 2012;181(6):1911-1920. doi:10.1016/j.ajpath.2012.08.022

22. Zhang Z, Gao X, He Y, et al. MicroRNA-411-3p inhibits bleomycin-induced skin fibrosis by regulating transforming growth factor-β/Smad ubiquitin regulatory factor-2 signalling. *J Cell Mol Med*. 2021;25(24):11290-11299. doi:10.1111/jcmm.17055

23. Miguel V, Busnadiego O, Fierro-Fernández M, Lamas S. Protective role for miR-9-5p in the fibrogenic transformation of human dermal fibroblasts. *Fibrogenes Tissue Repair*. 2016;9(1):1-14. doi:10.1186/s13069-016-0044-2

24. Zhang J, Zhou Q, Wang H, et al. MicroRNA-130a has pro-fibroproliferative potential in hypertrophic scar by targeting CYLD. *Arch Biochem Biophys*. 2019;671(July):152-161. doi:10.1016/j.abb.2019.07.003

25. Yang L, Liu L, Ying H, et al. Acute downregulation of miR-155 leads to a reduced collagen synthesis through attenuating macrophages inflammatory factor secretion by targeting SHIP1. *J Mol Histol*. 2018;49(2):165-174. doi:10.1007/s10735-018-9756-5

26. Zhou Y, Shi X, Li S, Gan Q, Cui Z. microRNA-181a promotes the proliferation of hypertrophic scar fibroblasts and inhibits their apoptosis via targeting phosphatase and tensin homolog. *Ann Palliat Med*. 2021;10(4):4563-4571. doi:10.21037/apm-21-604

27. Hu Y, Rao SS, Wang ZX, et al. Exosomes from human umbilical cord blood accelerate cutaneous wound healing through miR-21-3p-mediated promotion of angiogenesis and fibroblast function. *Theranostics*. 2018;8(1):169-184. doi:10.7150/thno.21234

28. Auler M, Bergmeier V, Georgieva VS, et al. miR-127-3p is an epigenetic activator of myofibroblast senescence situated within the miRNA enriched Dlk1-Dio3 imprinted domain on mouse chromosome 12. *J Invest Dermatol*. Published online 2020. doi:10.1016/j.jid.2020.11.011

29. Li X, Li D, Wikstrom JD, et al. MicroRNA-132 promotes fibroblast migration via regulating RAS p21 protein activator 1 in skin wound healing. *Sci Rep*. 2017;7(1):1-9. doi:10.1038/s41598-017-07513-0

30. Gras C, Ratuszny D, Hadamitzky C, Zhang H, Blasczyk R, Figueiredo C. miR-145 contributes to hypertrophic scarring of the skin by inducing myofibroblast activity. *Mol Med*. 2015;21:296-304. doi:10.2119/molmed.2014.00172

31. Fujisawa C, Hamanoue M, Kawano Y, et al. The Role for miR-146b-5p in the Attenuation of Dermal Fibrosis and Angiogenesis by Targeting PDGFRα in Skin Wounds. *J Invest Dermatol*. 2022;142(7):1990-2002.e4. doi:10.1016/j.jid.2021.11.037

32. Yao Q, Cao S, Li C, Mengesha A, Kong B, Wei M. Micro-RNA-21 regulates TGF-β-induced myofibroblast differentiation by targeting PDCD4 in tumor-stroma interaction. *Int J Cancer*. 2011;128(8):1783-1792. doi:10.1002/ijc.25506

33. Li H, Han X, Zuo K, et al. MiR-23b promotes cutaneous wound healing through inhibition of the inflammatory responses by targeting ASK1. *Acta Biochim Biophys Sin (Shanghai)*. 2018;50(11):1104-1113. doi:10.1093/abbs/gmy109

34. Jin Y, Tymen SD, Chen D, et al. MicroRNA-99 Family Targets AKT/mTOR Signaling Pathway in Dermal Wound Healing. *PLoS One*. 2013;8(5). doi:10.1371/journal.pone.0064434

35. Wang X, Wu Y, Du P, et al. Study on the Mechanism of miR-125b-5p Affecting Melanocyte Biological Behavior and Melanogenesis in Vitiligo through Regulation of MITF. *Dis Markers*. 2022;2022. doi:10.1155/2022/6832680

36. Zhu Z, He J, Jia X, et al. MicroRNA-25 functions in regulation of pigmentation by targeting the transcription factor MITF in alpaca (Lama pacos) skin melanocytes. *Domest Anim Endocrinol*. 2010;38(3):200-209. doi:10.1016/j.domaniend.2009.10.004

37. Wang XY, Guan XH, Yu ZP, et al. Human amniotic stem cells-derived exosmal miR-181a-5p and miR-199a inhibit melanogenesis and promote melanosome degradation in skin hyperpigmentation, respectively. *Stem Cell Res Ther*. 2021;12(1):1-16. doi:10.1186/s13287-021-02570-9

38. Du B, Liu X, Khan A, et al. miRNA-183∼96∼182 regulates melanogenesis, cell proliferation and migration in B16 cells. *Acta Histochem*. 2020;122(3):151508. doi:10.1016/j.acthis.2020.151508

39. Guo J, Zhang JF, Wang WM, et al. MicroRNA-218 inhibits melanogenesis by directly suppressing microphthalmia-associated transcription factor expression. *RNA Biol*. 2014;11(6):732-741. doi:10.4161/rna.28865

40. Yang Y, Wei X, Bai J, et al. MicroRNA-340 is involved in ultraviolet B-induced pigmentation by regulating the MITF/TYRP1 axis. *J Int Med Res*. 2020;48(11). doi:10.1177/0300060520971510

41. Dynoodt P, Mestdagh P, Van Peer G, et al. Identification of miR-145 as a key regulator of the pigmentary process. *J Invest Dermatol*. 2013;133(1):201-209. doi:10.1038/jid.2012.266

42. Zhao Y, Wang P, Meng J, et al. MicroRNA-27a-3p inhibits melanogenesis in mouse skin melanocytes by targeting Wnt3a. *Int J Mol Sci*. 2015;16(5):10921-10933. doi:10.3390/ijms160510921

43. Liu B, Zhang J, Hu S, et al. MicroRNA-379 mediates pigmentation, migration and proliferation of melanocytes by targeting the insulin-like growth factor 1 receptor. *Exp Dermatol*. 2020;29(5):467-476. doi:10.1111/exd.14095

44. Liu X, Du B, Zhang P, et al. MiR-380-3p regulates melanogenesis by targeting SOX6 in melanocytes from alpacas (Vicugna pacos). *BMC Genomics*. 2019;20(1):1-10. doi:10.1186/s12864-019-6343-4

45. Sun X, Wang T, Huang B, Ruan G, Xu A. MicroRNA-421 participates in vitiligo development through regulating human melanocyte survival by targeting receptor-interacting serine/threonine kinase 1. *Mol Med Rep*. 2020;21(2):858-866. doi:10.3892/mmr.2019.10878

46. Lin KY, Chen CM, Lu CY, Cheng CY, Wu YH. Regulation of miR-21 expression in human melanoma via UV-ray-induced melanin pigmentation. *Environ Toxicol*. 2017;32(8):2064-2069. doi:10.1002/tox.22421

47. Šahmatova L, Tankov S, Prans E, et al. MicroRNA-155 is dysregulated in the skin of patients with vitiligo and inhibits melanogenesis-associated genes in melanocytes and keratinocytes. *Acta Derm Venereol*. 2016;96(6):742-747. doi:10.2340/00015555-2394
